# Supplementary material for: Actively tunable and switchable terahertz metamaterials with multi-band perfect absorption and polarization conversion
Source: Royal Society of Chemistry journal article supplement (doi:10.1039/d3cp06310k), 2024-01-01
Supplement: d3cp06310k1.pdf [file d3cp06310k1.pdf]

## Actively tunable and switchable terahertz metamaterials with multi-band perfect absorption and polarization conversion: supplement

Ying Zhu, Zhiyu Huang, Jiangbin Su, and Bin Tang \*

School of Microelectronics and Control Engineering, Changzhou University, Changzhou 213164, China. \*E-mail: [btang@cczu.edu.cn](mailto:btang@cczu.edu.cn)

### Supplementary S1: The influence of different patterns of VO<sub>2</sub> and Au on the properties of metamaterials

During the design process, we had explored different configurations on the top layer of metamaterials, such as rectangles, squares, circles, and ellipses. After plenty of sweeping calculations, we found that when the shape of top patterned configuration is square or circular, the proposed metamaterials cannot achieve efficient polarization conversion effect as shown in Figure S1 (a). Moreover, when the top pattern is rectangular, the proposed metamaterials cannot act as perfect multi-band electromagnetic absorber as shown in Figure S1 (b). Therefore, only the current elliptical patterns can simultaneously obtain the perfect absorption, high PCR, and ideal ellipticity

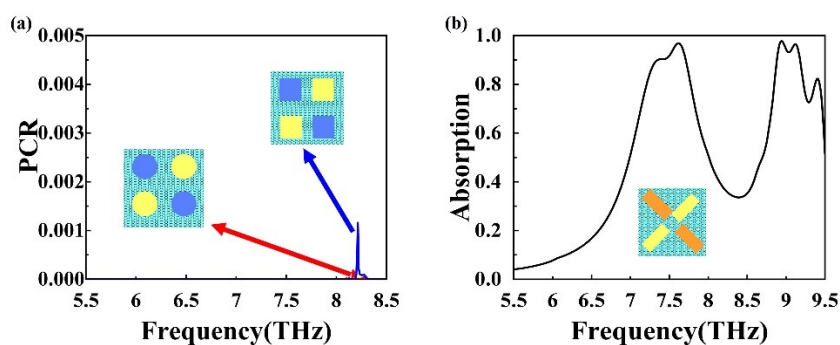

Figure S1. (a) The curves of PCR for different configurations on the top layer when VO<sub>2</sub> is in insulating state; (b) Absorption spectrum when the top pattern is rectangular (VO<sub>2</sub> is in the metallic state)

### Supplementary S2: The influence of the thickness of SiO<sub>2</sub> on the absorption, PCR and ellipticity.

In our simulations, the dielectric layer is selected as lossless SiO<sub>2</sub> material. The thickness of SiO<sub>2</sub> is chosen as  $t_2 = 19 \mu\text{m}$ . Figure S2 shows the effects of the thickness of SiO<sub>2</sub> on the performance of the proposed metamaterial. One can see from this picture that the absorption spectra have a significant change when the thickness of SiO<sub>2</sub> is increased from 17 to 21  $\mu\text{m}$ . Meanwhile, the spectra of PCR and ellipticity have a red-shift with the increasing of thickness of SiO<sub>2</sub>. As  $t_2$  increases, the ability of linear-to-linear polarization conversion weakens, while conversely, the effect of linear-to-circular polarization conversion improves.

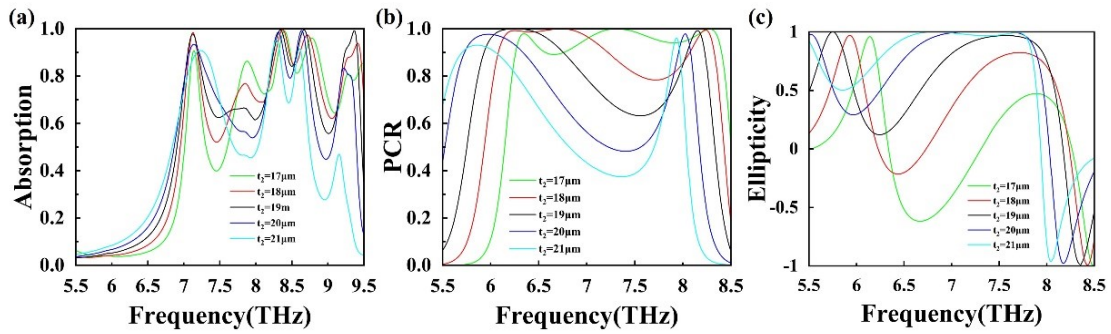

Figure S2. The influence of the thickness of SiO<sub>2</sub> on the (a) absorption, (b) PCR and (c) ellipticity.

### Supplementary S3: The influence of the number of VO<sub>2</sub> and Au fragments on the absorption.

The number of VO<sub>2</sub> and Au fragments on graphene play an important role in achieving the above-mentioned multi-functionality. When the number of VO<sub>2</sub> and Au in the top layer decreases, the localized ability of the metal to electromagnetic waves weakens, making it impossible to achieve perfect absorption of electromagnetic waves. Figure S3 shows the absorption spectra corresponding to different numbers of ellipsoids.

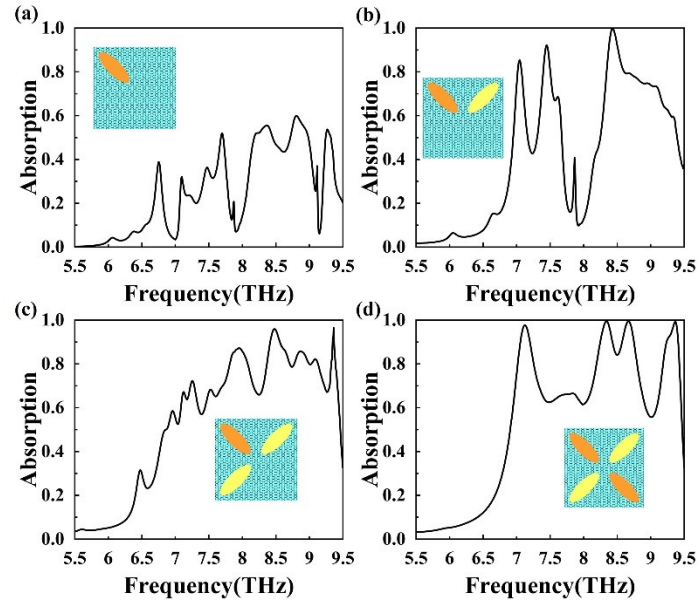

Figure S3. Absorption spectra of the metamaterials with different numbers of ellipsoids.

### Supplementary S4: Convergence criteria for geometric parameter optimization process.

To obtain the optimized geometric parameters, we can perform the parameters sweeping by altering the sizes and the positions of the structural elements. During the optimization process, we aim to obtain the perfect absorption, high PCR, and ideal ellipticity. Specially, the absorption efficiency should be nearly 100% when the proposed metamaterial acts as an absorber. Moreover, the PCR and ellipticity should be 1 or -1 to achieve the perfect linear-to-linear and linear-to-circular polarization conversions.

Here we take the radii  $r_1$  and  $r_2$  of the ellipsoids as examples. To obtain the optimized radii  $r_1$  and  $r_2$  of the ellipsoids, we calculate the PCR, ellipticity and absorption spectra of proposed metamaterial as a function of frequency and radii  $r_1$ , separately, as shown in Figure S4-1. Moreover, we calculate the PCR, ellipticity and absorption spectra of proposed metamaterial as a function of frequency and radii  $r_2$ , separately, as shown in Figure S4-2. One can easily observe from Figure S4-1 and Figure S4-2 that when  $r_1=8\ \mu\text{m}$ ,  $r_2=2.75\ \mu\text{m}$ , the PCR is nearly equal to 1 at the frequency region from 6.09 to 6.43 THz and 8.15 THz, and the ellipticity is greater than 0.9 in the range from 7.16 to 7.89 THz. Meanwhile, the ellipticity is close to -1 at 8.34 THz. In addition, the proposed metamaterial exhibits a four-band nearly perfect absorption of electromagnetic waves at 7.12 THz, 8.33 THz, 8.67 THz, and 9.36 THz, separately. Therefore, we can determine the optimized radii  $r_1$  and  $r_2$  of the ellipsoids by sweeping the geometrical parameters. The optimization process of other geometric parameters of the metamaterials is also the same as these of  $r_1$  and  $r_2$ .

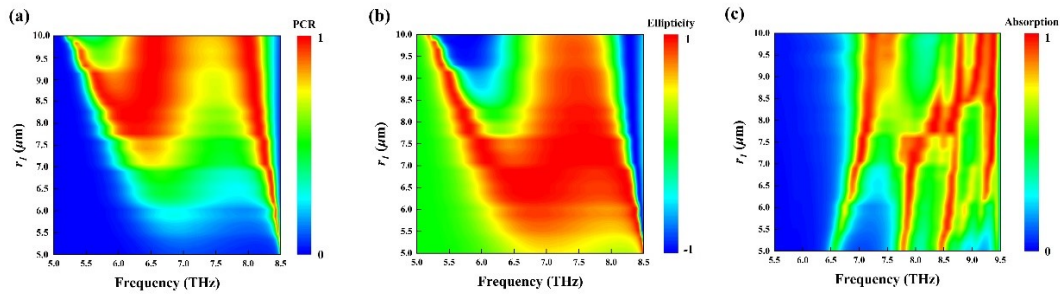

Figure S4-1. Optimization process of geometric parameter  $r_1$

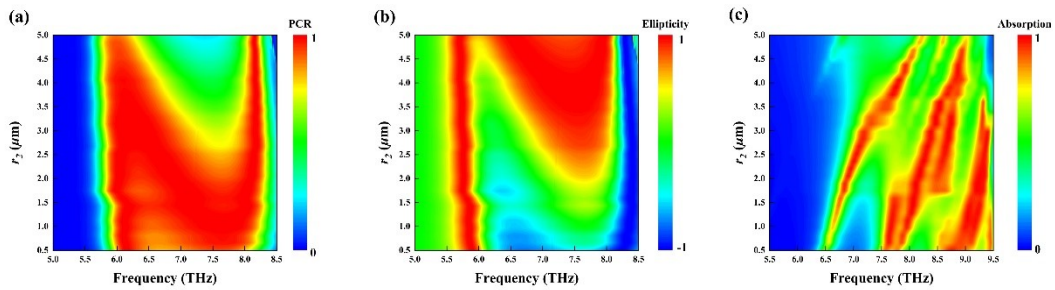

Figure S4-2. Optimization process of geometric parameter  $r_2$
